# Supplementary material
Source: Preprints.org preprint supplement (doi:10.20944/preprints202008.0161.v2)
Supplement: Supplementary file 1 [file supplementary]

## Supplementary Information

# Mixed amphiphilic polymeric nanoparticles of chitosan, poly(vinyl alcohol) and poly(methyl methacrylate) for intranasal drug delivery: A preliminary *in vivo* study

Inbar Schlachet, Hen Moshe Halamish and Alejandro Sosnik<sup>1,\*</sup>

<sup>1</sup> Laboratory of Pharmaceutical Nanomaterials Science, Department of Materials Science and Engineering, Technion-Israel Institute of Technology, Haifa, Israel

\* Correspondence: Laboratory of Pharmaceutical Nanomaterials Science, De-Jur Bldg., Office 607, Department of Materials Science and Engineering, Technion-Israel Institute of Technology, 3200003 Haifa, Israel; Email: [sosnik@technion.ac.il](mailto:sosnik@technion.ac.il), [alesosnik@gmail.com](mailto:alesosnik@gmail.com); Tel.: +972-77-887-1971

**Supplementary Table 1.** Hydrodynamic diameter ( $D_h$ ), size distribution (expressed as PDI) and Z-potential of CS-PMMA30, PVA-PMMA16 and mixed CS-PMMA30:PVA-PMMA16 nanoparticles (total copolymer concentration of 0.1% w/v), as determined by DLS. Nanoparticle crosslinking was carried out with 1% w/v TPP. Data are reproduced from Refs. 32-34 and 43.

| Nanoparticle               | TPP volume ( $\mu\text{L}$ ) <sup>a</sup> | $D_h$ – Intensity (nm) ( $\pm$ S.D.) | PDI ( $\pm$ S.D.) | Z-potential (mV) ( $\pm$ S.D.) |
|----------------------------|-------------------------------------------|--------------------------------------|-------------------|--------------------------------|
| CS-PMMA30                  | -                                         | 184 (4)                              | 0.20 (0.01)       | +39 (1)                        |
|                            | 5                                         | 332 (54)                             | 0.33 (0.03)       | +28 (2)                        |
| PVA-PMMA16                 | -                                         | 92 (4)                               | 0.14 (0.01)       | -17 (1)                        |
| CS-PMMA30:PVA-PMMA16 (1:1) | -                                         | 193 (62)                             | 0.23 (0.06)       | +30 (1)                        |
|                            | 2.5                                       | 249 (26)                             | 0.26 (0.01)       | +10 (1)                        |

<sup>a</sup> Volume of 1% w/v TPP solution per mL of nanoparticle dispersion.

**Supplementary Table 2.** Statistical analysis of AFR data in the different organs and time points after i.v. and i.n. administration of mixed CS-PMMA30:PVA-PMMA16 nanoparticles, as analyzed by the IVIS Spectrum In Vivo Imaging System ( $P < 0.05$ ).

| Organ       | Time point                |                           |                           |                           |
|-------------|---------------------------|---------------------------|---------------------------|---------------------------|
|             | 0.5 h                     | 1 h                       | 2 h                       | 4 h                       |
| “Top” brain | Statistically different   | Statistically different   | Statistically different   | Statistically different   |
| Lungs       | Statistically different   | Statistically different   | No statistical difference | Statistically different   |
| Heart       | No statistical difference | No statistical difference | No statistical difference | Statistically different   |
| Spleen      | No statistical difference | No statistical difference | No statistical difference | No statistical difference |
| Kidney      | No statistical difference | Statistically different   | Statistically different   | Statistically different   |
| Liver       | No statistical difference | No statistical difference | Statistically different   | Statistically different   |
